# Supplementary material
Source: Springer Nature journal article supplement (https://www.springermedizin.de/resource/supplementary/12936_2014_3243_MOESM1_ESM.pdf/9545450)

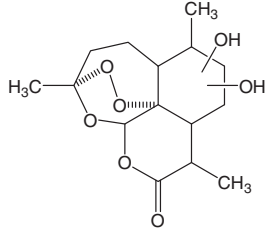

**M3**

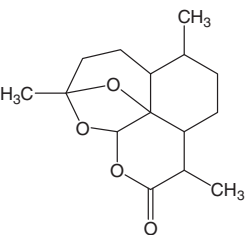

**Deoxy-QHS**

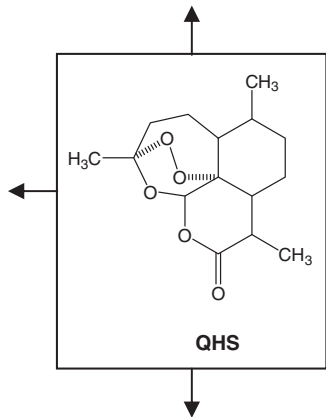

**QHS**

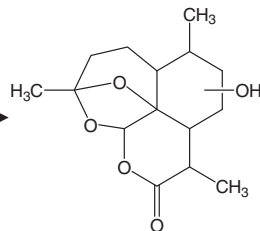

**M1**

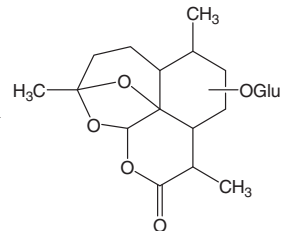

**M4**

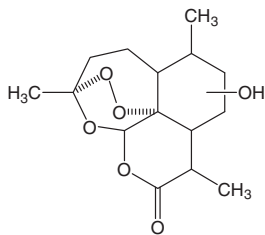

**M2**

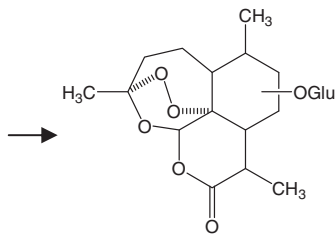

**M5**

Supplement: MOESM1 [file 9545450]
